# Supplementary figures and images for: A Mouse Model for Studying the Development of Apical Periodontitis with Age
Source: MDPI journal article supplement (doi:10.3390/cells10030671), 2021-03-17

**A**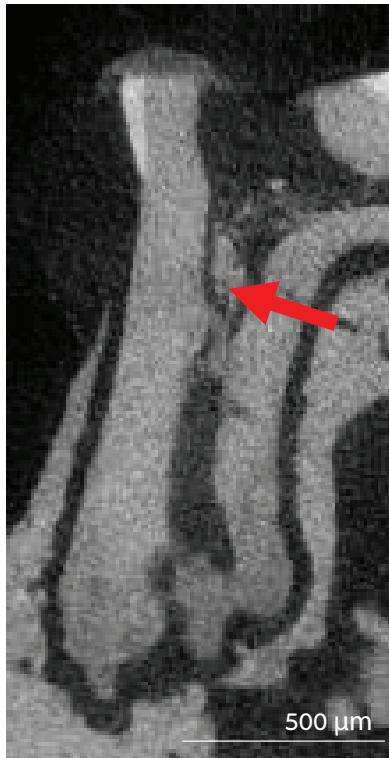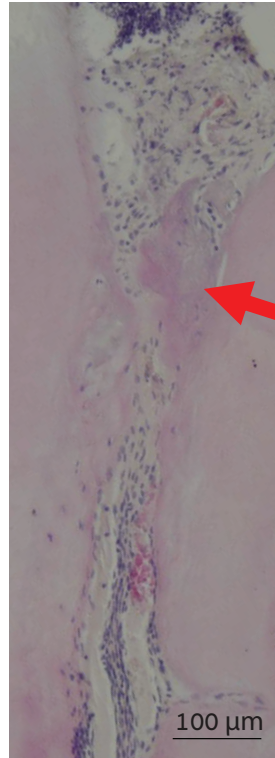**B**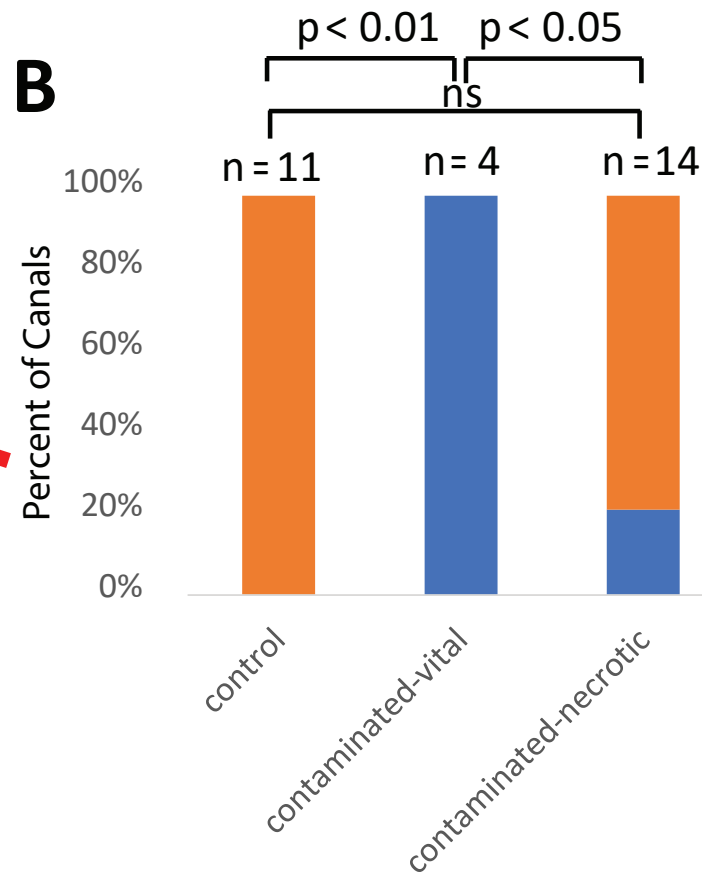**C**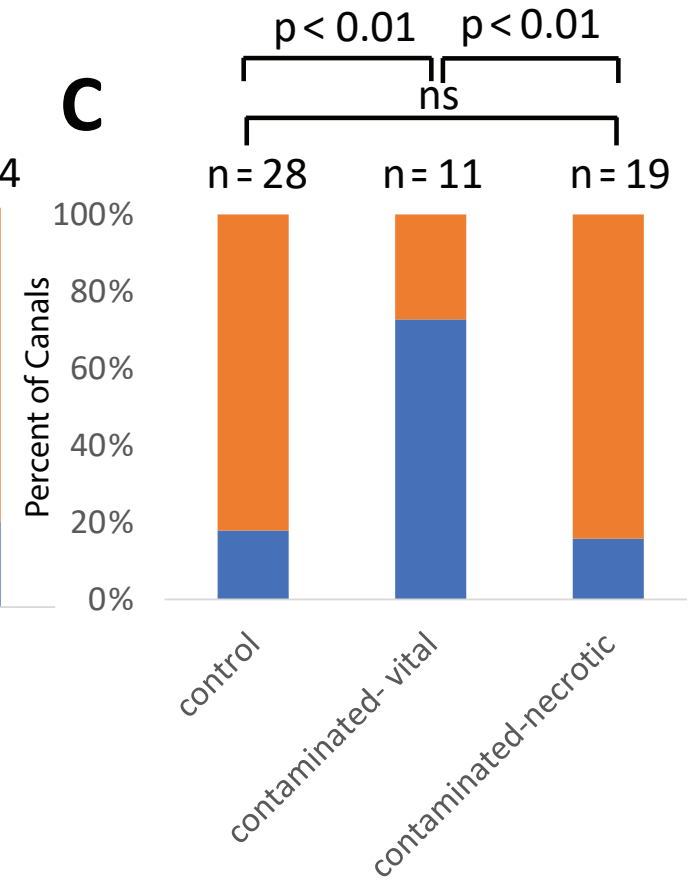

■ canal obliteration ■ no canal obliteration

Young

Adult

Supplement: s1 [file s1]

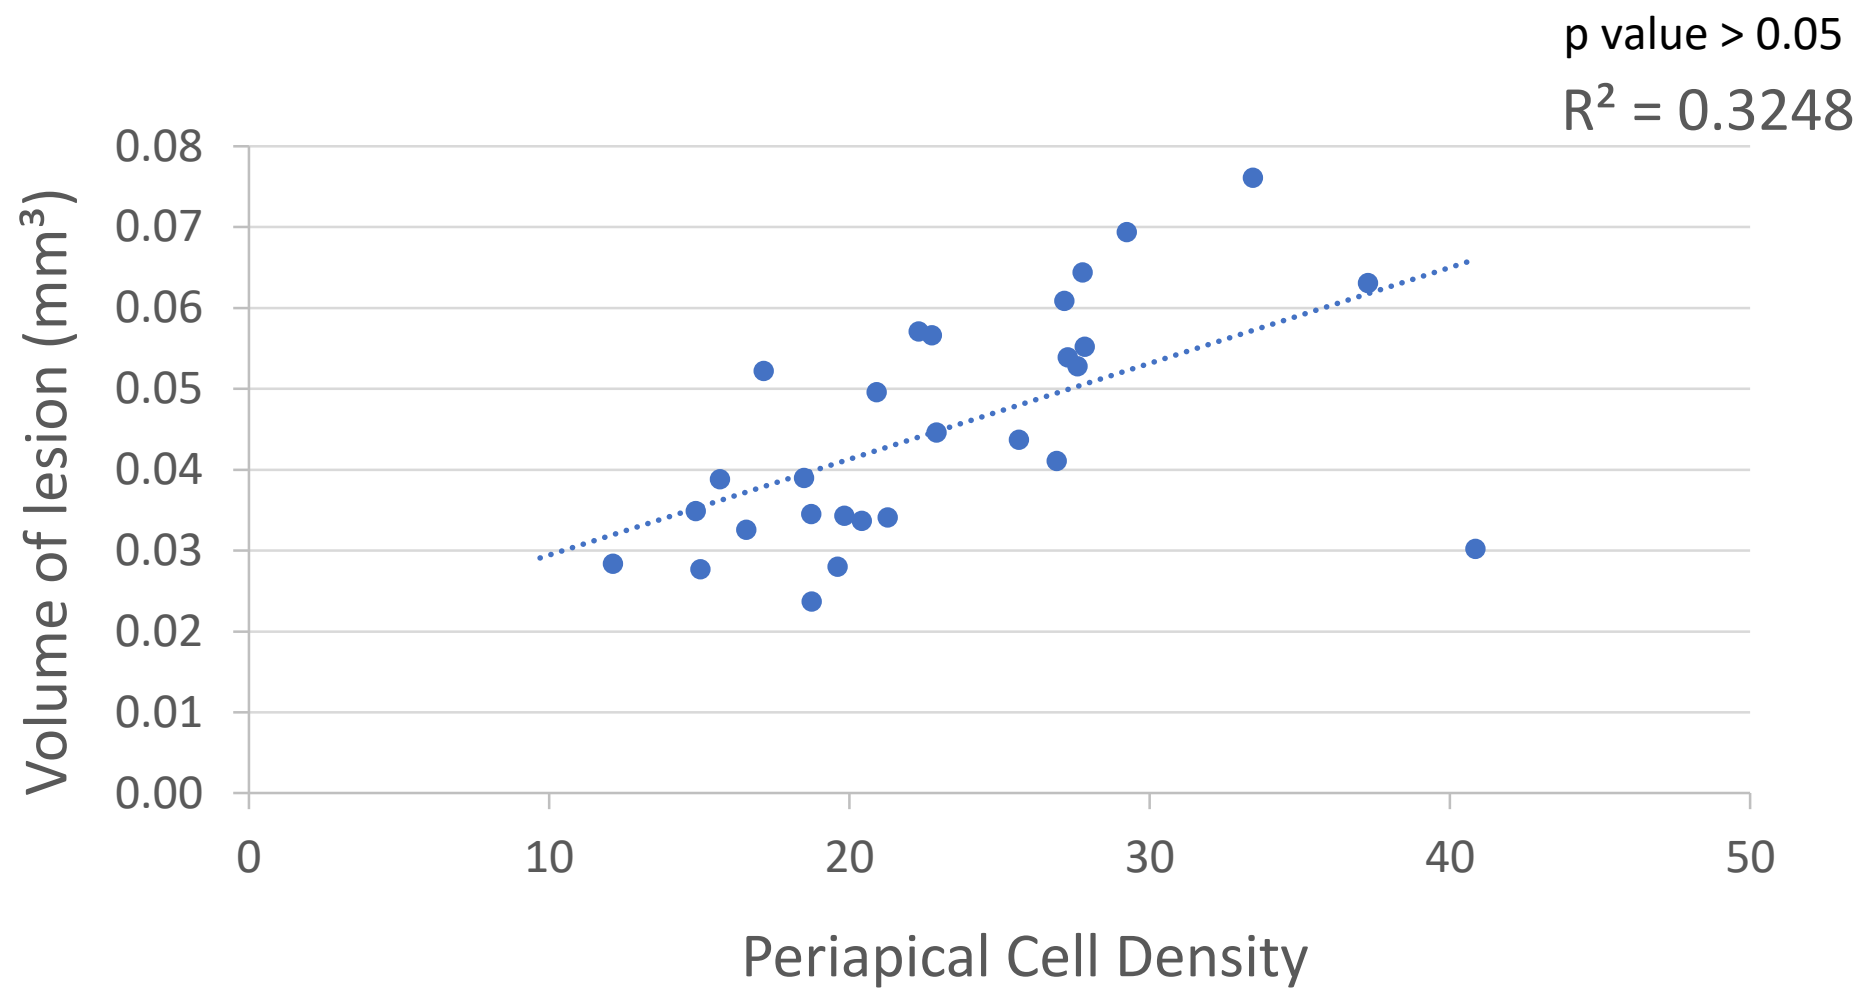

Supplement: s1 [file s1]

A

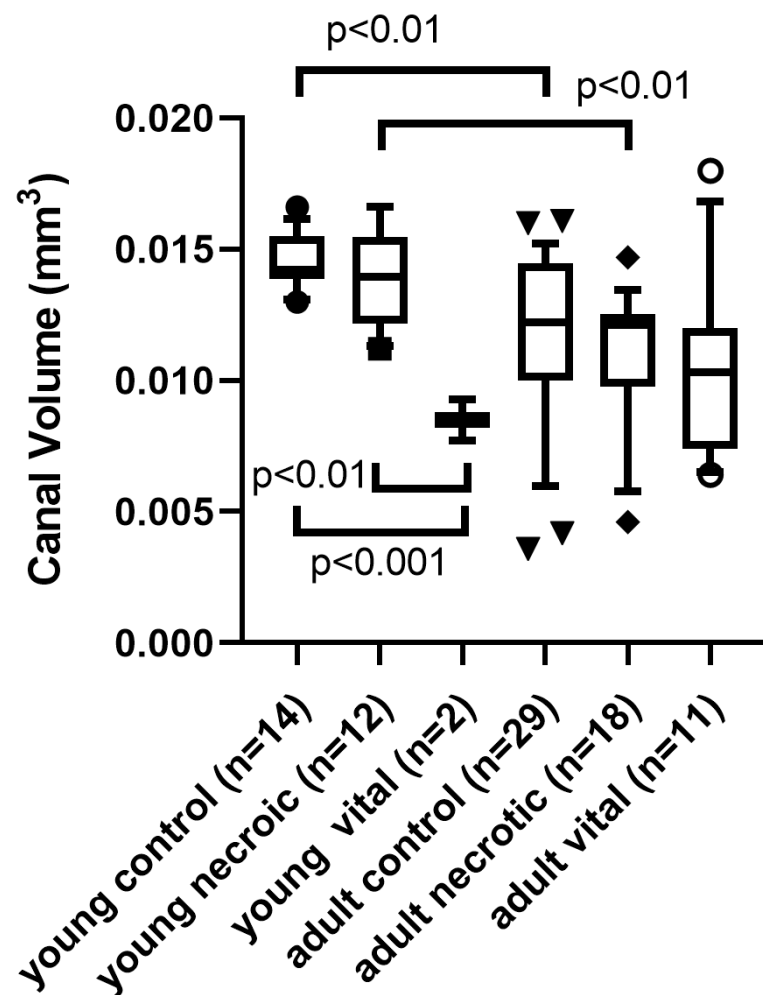

B

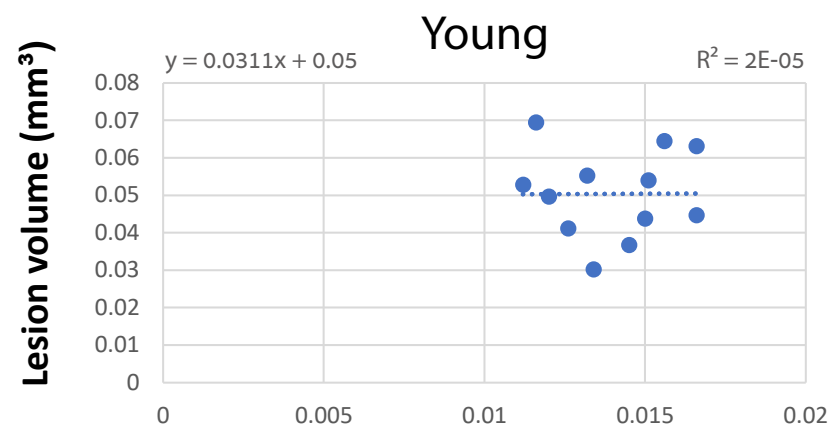

C

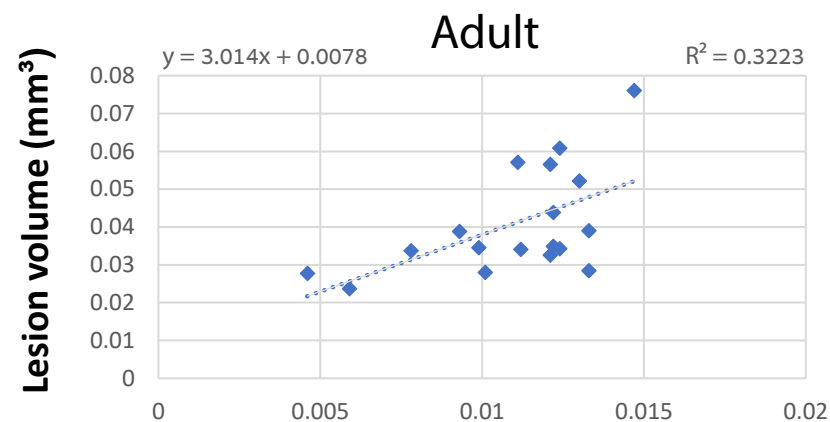

D

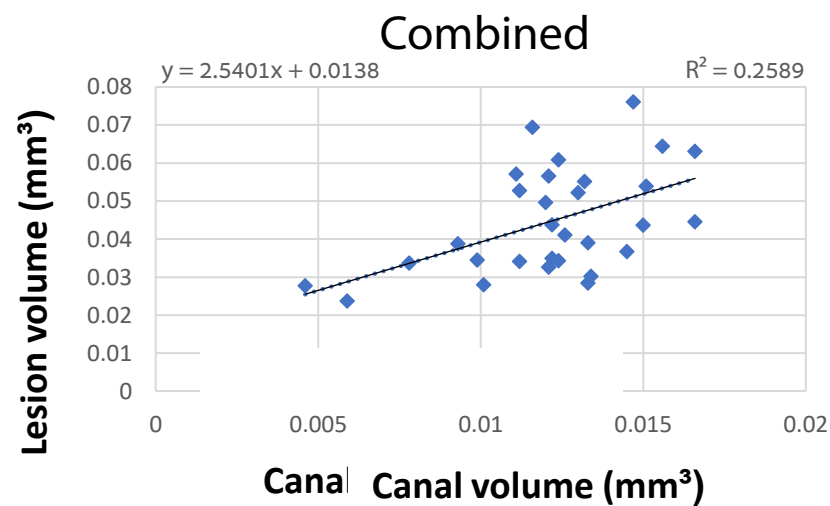

Supplement: s1 [file s1]

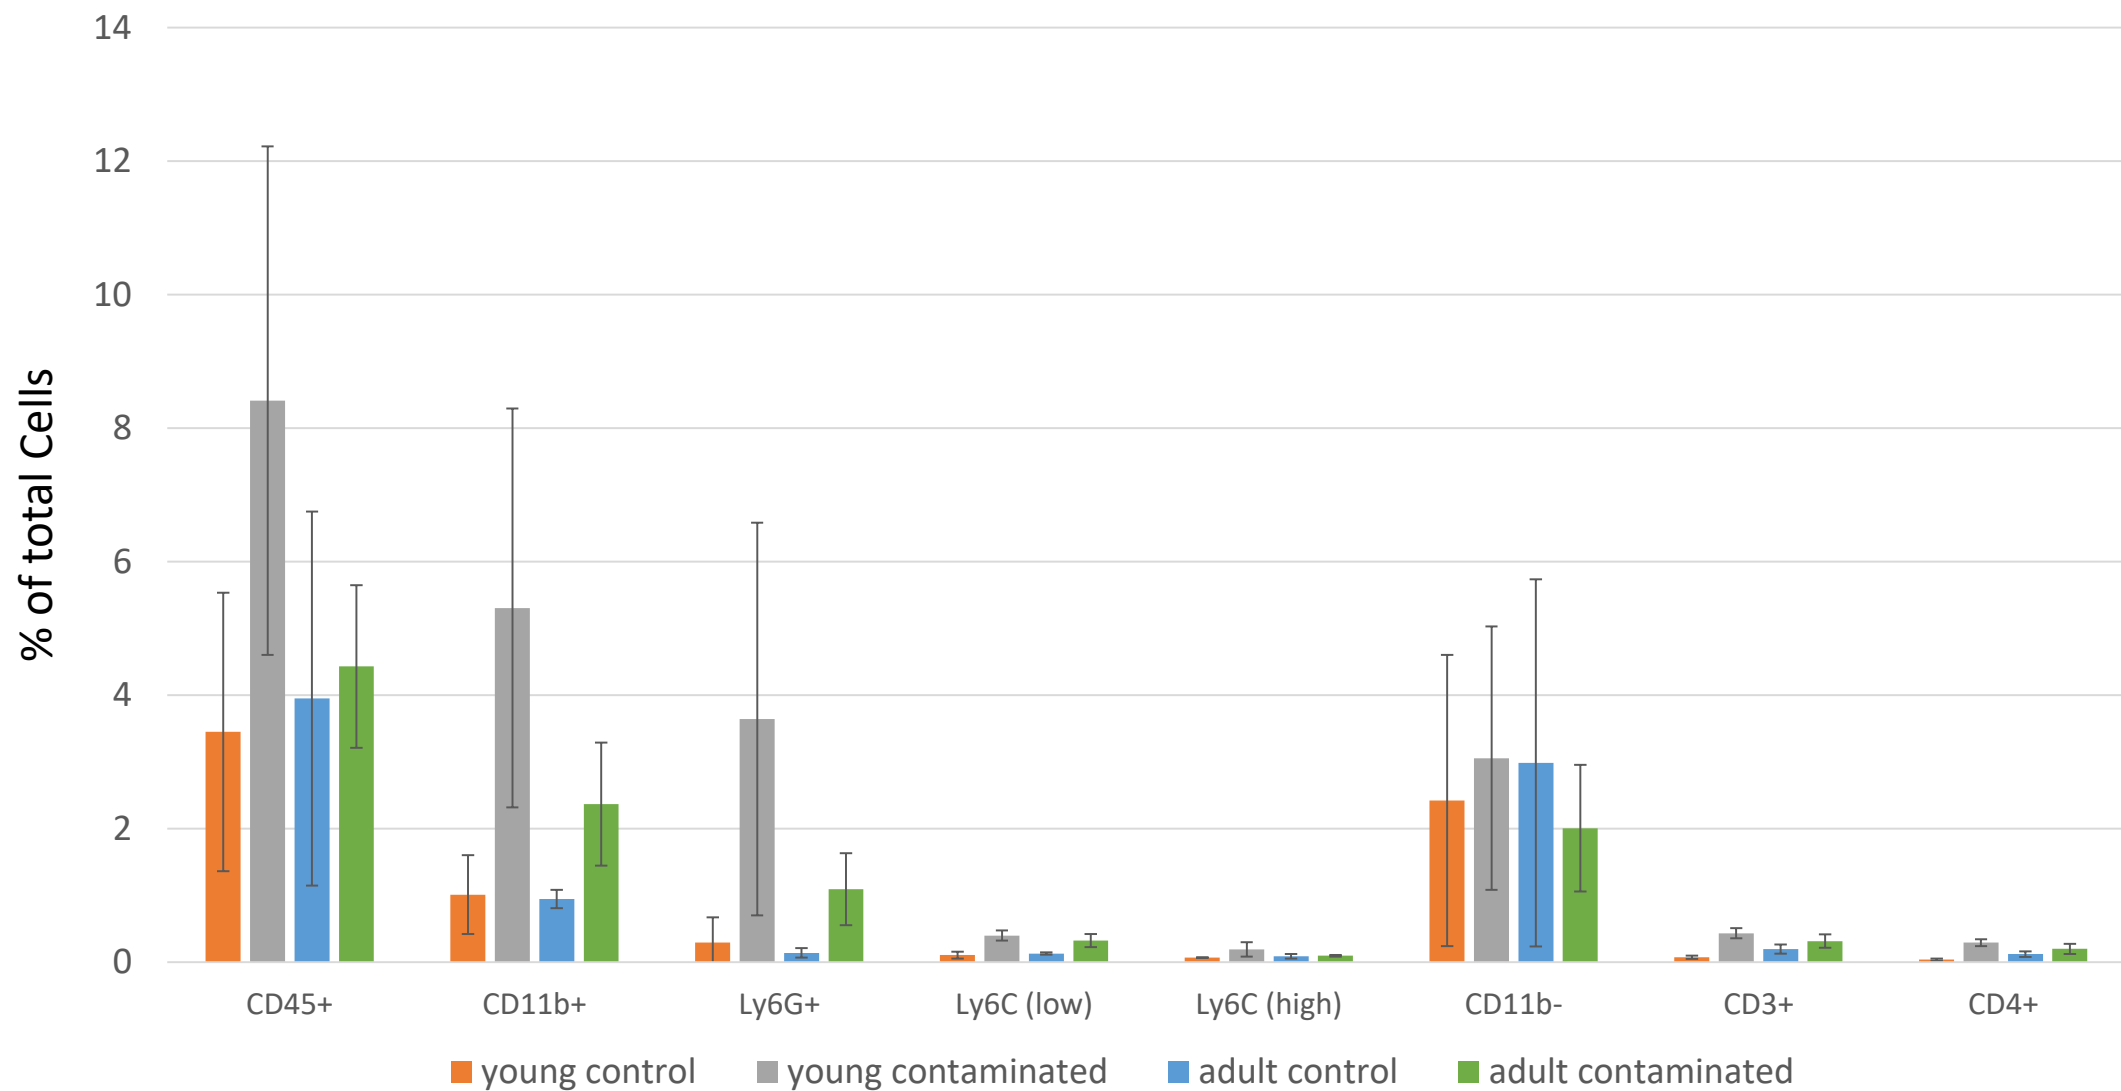

Supplement: s1 [file s1]

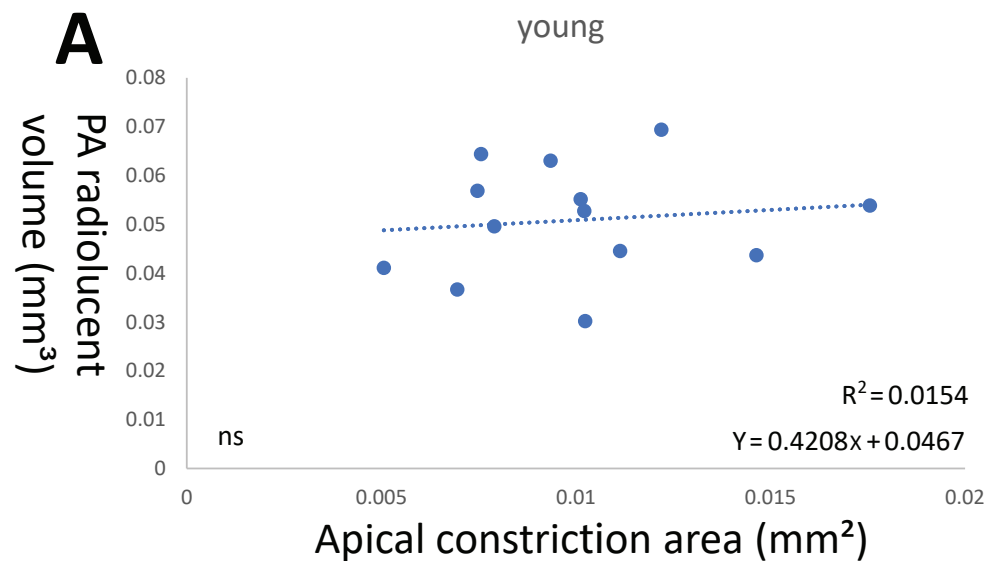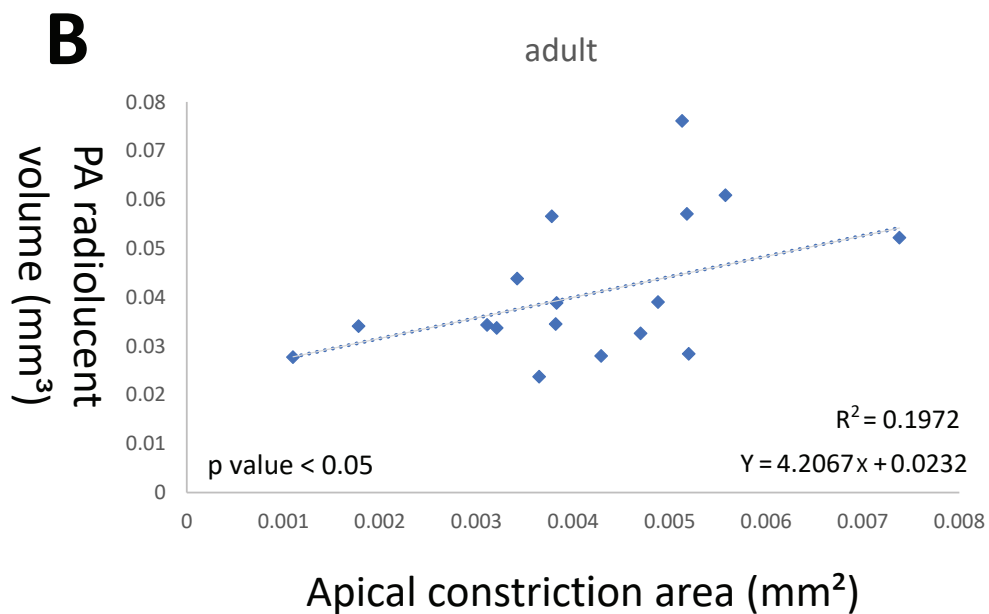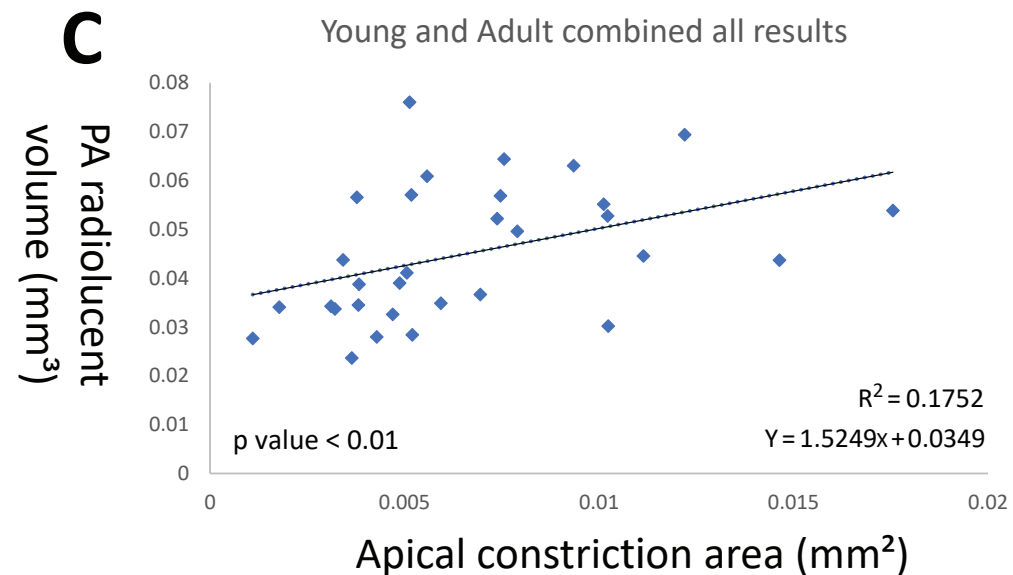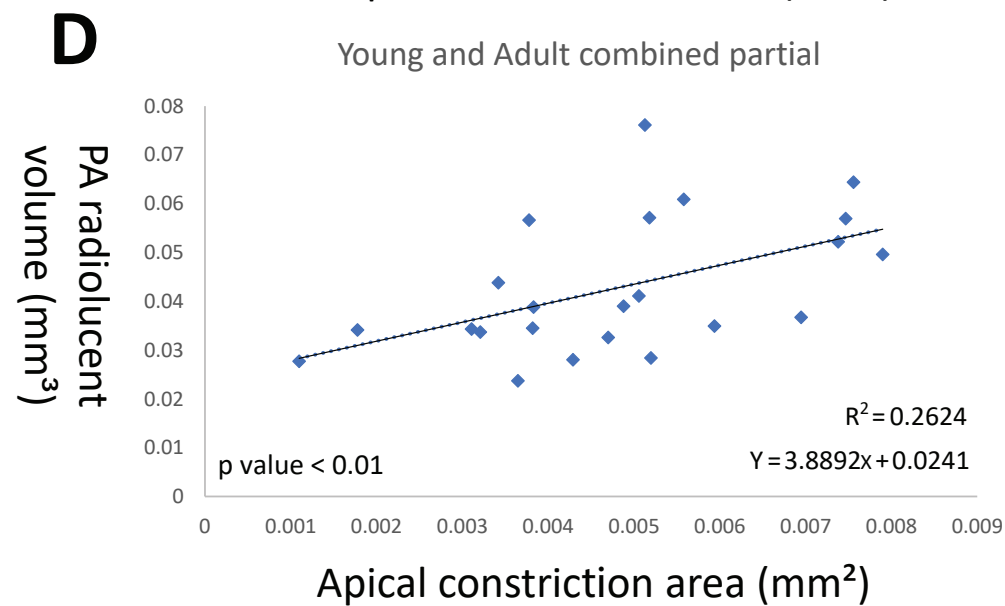

Supplement: s1 [file s1]
